# Supplementary material for: Comparative Study of Circulating MMP-7, CCL18, KL-6, SP-A, and SP-D as Disease Markers of Idiopathic Pulmonary Fibrosis
Source: PubMed Central journal article supplement (PMC4886062; doi:10.1155/2016/4759040), 2016-05-17

**Supplementary materials**

**Comparative Study of Circulating MMP-7, CCL18, KL-6, SP-A, and SP-D as **Disease Markers**  
of Idiopathic Pulmonary Fibrosis**

**Authors**

Kosuke Hamai<sup>1</sup>, Hiroshi Iwamoto<sup>1\*</sup>, Nobuhisa Ishikawa<sup>2</sup>, Yasushi Horimasu<sup>1</sup>, Takeshi Masuda<sup>1</sup>,  
Shintaro Miyamoto<sup>1</sup>, Taku Nakashima<sup>1</sup>, Shinichiro Ohshimo<sup>1</sup>, Kazunori Fujitaka<sup>1</sup>, Hironobu Hamada<sup>3</sup>,  
Noboru Hattori<sup>1</sup>, Nobuoki Kohno<sup>1</sup>

<sup>1</sup> Department of Molecular and Internal Medicine, Graduate School of Biomedical and Health Sciences,  
Hiroshima University

<sup>2</sup> Department of Respiratory Medicine, Hiroshima Prefectural Hospital

<sup>3</sup> Department of Physical Analysis and Therapeutic Sciences, Graduate School of Biomedical and Health  
Sciences, Hiroshima University

**\*Corresponding author**

Hiroshi Iwamoto, MD, Ph.D.

**TABLE S1:** Cut off values and the discriminatory ability of five biomarkers by ROC curve analysis, which distinguishes patients with IPF from (a) BP and (b) HC.

(a)

|                     | MMP-7         | CCL18         | KL-6          | SP-A          | SP-D          |
|---------------------|---------------|---------------|---------------|---------------|---------------|
| AUC                 | 0.8998        | 0.5365        | 0.9918        | 0.5494        | 0.7866        |
| 95% CI              | 0.8280–0.9715 | 0.6642–0.4088 | 0.9806–1.0030 | 0.4250–0.6738 | 0.6852–0.8880 |
| Cut-off value       | 5.56 ng/ml    | 38.7 ng/ml    | 476 U/ml      | 44.0 ng/ml    | 107.0 ng/ml   |
| Sensitivity         | 87.7%         | 66.2%         | 96.9%         | 66.2%         | 84.6%         |
| Specificity         | 77.4%         | 32.3%         | 93.5%         | 61.9%         | 61.3%         |
| Diagnostic accuracy | 84.4%         | 55.2%         | 95.8%         | 65.1%         | 77.1%         |
| Likelihood ratio    | 3.9           | 1.0           | 15.0          | 1.7           | 2.2           |

(b)

|                     | MMP-7         | CCL18         | KL-6          | SP-A          | SP-D          |
|---------------------|---------------|---------------|---------------|---------------|---------------|
| AUC                 | 0.9837        | 0.7767        | 0.9969        | 0.8572        | 0.9673        |
| 95% CI              | 0.9652–1.0020 | 0.7140–0.8519 | 0.9922–1.0020 | 0.8019–0.9125 | 0.9442–0.9903 |
| Cut-off value       | 5.56 ng/ml    | 38.7 ng/ml    | 476 U/ml      | 44.0 ng/ml    | 107.0 ng/ml   |
| Sensitivity         | 87.7%         | 66.2%         | 96.9%         | 66.2%         | 84.6%         |
| Specificity         | 98.0%         | 78.2%         | 100.0%        | 86.1%         | 97.0%         |
| Diagnostic accuracy | 94.0%         | 73.5%         | 98.8%         | 78.3%         | 92.2%         |

|                  |      |     |   |     |      |
|------------------|------|-----|---|-----|------|
| Likelihood ratio | 44.3 | 3.0 | — | 4.8 | 28.5 |
|------------------|------|-----|---|-----|------|

---

ROC: receiver operating characteristic, IPF: idiopathic pulmonary fibrosis, BP: bacterial pneumonia, HC: healthy controls, MMP-7: matrix metalloproteinase-7, CCL18: CC-chemokine ligand 18, KL-6: Krebs von den Lungen-6, SP-A: surfactant protein-A, SP-D: surfactant protein-D, 95% CI: 95% confidence interval

**FIGURE S1:** ROC curve analysis in serum levels of KL-6, MMP-7 and the combination of serum levels of KL-6 and MMP-7 to distinguish IPF patients from patients with bacterial pneumonia and healthy controls. There was no significant difference between the combination of KL-6 and MMP-7 and either marker alone in the area under the curve of ROC.

**FIGURE S2:** ROC curve analysis in five biomarkers to distinguish IPF patients from (a) those with bacterial pneumonia and (b) healthy controls.

**FIGURE S3:** Kaplan-Meier analysis of the IPF patients using biomarker levels above or below the cut-off levels.

**FIGURE S4:** Martingale residuals plots employed to check for assumptions of the Cox proportional hazards model.

FIGURE S1:

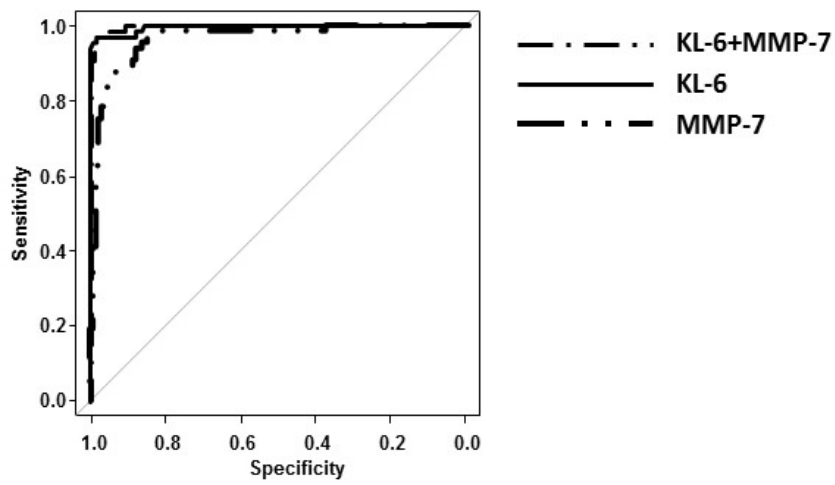

FIGURE S2:

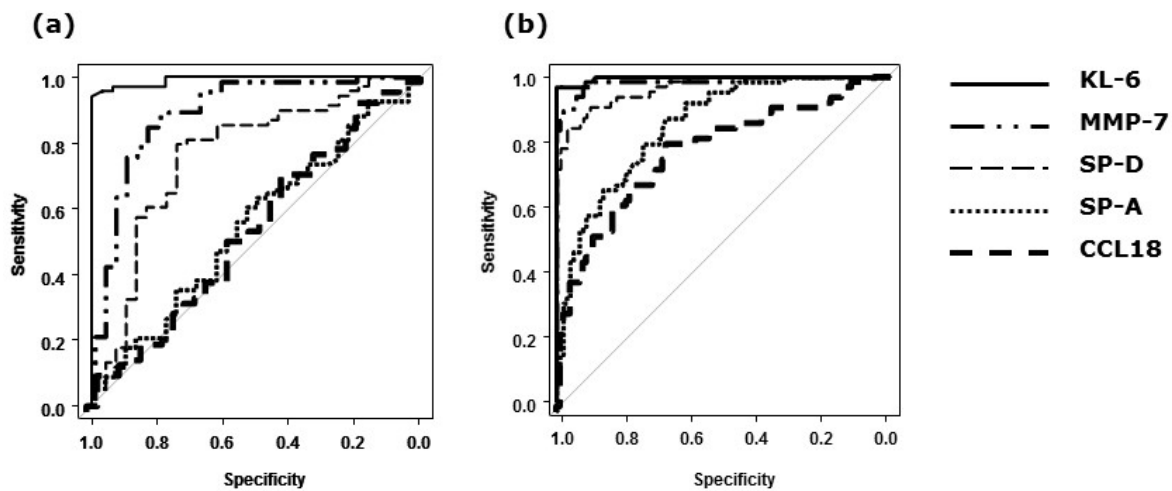

FIGURE S3:

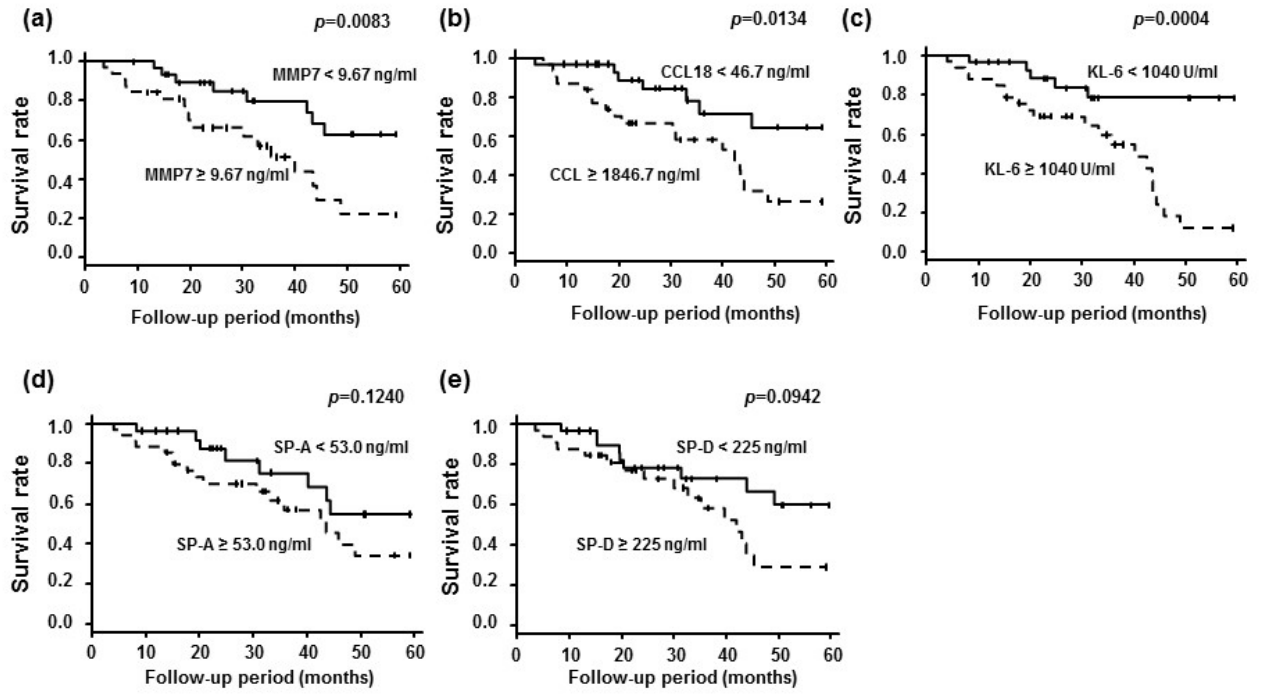

FIGURE S4:

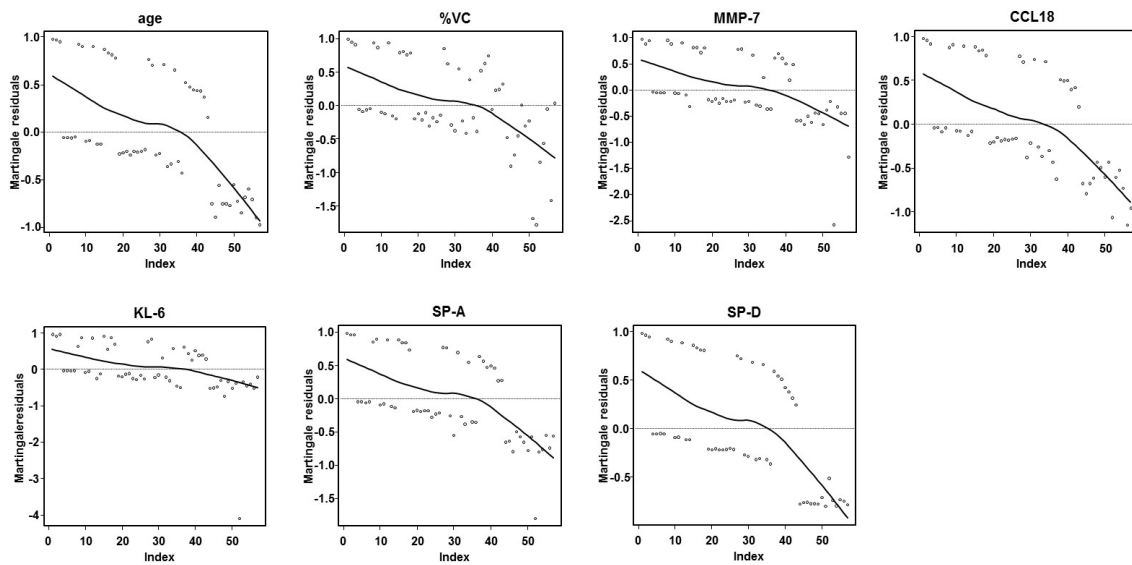

Supplement: 4759040.f1.pdf [file 4759040.f1.pdf]
